# Supplementary material for: Significance of STAT3 in Immune Infiltration and Drug Response in Cancer
Source: PubMed Central journal article supplement (PMC7355836; doi:10.3390/biom10060834), 2020-05-29
Supplement: biomolecules-10-00834-s001.pdf [file biomolecules-10-00834-s001.pdf]

**Table 1.** Correlation analysis between STAT3 and gene markers of immune cells in TIMER.

| Immune Cells                      | Gene Markers           | BLCA  |          | KICH  |          | PRAD  |          |
|-----------------------------------|------------------------|-------|----------|-------|----------|-------|----------|
|                                   |                        | Cor   | <i>p</i> | Cor   | <i>p</i> | Cor   | <i>p</i> |
| CD8 <sup>+</sup> Tcell            | CD8A                   | 0.253 | ***      | 0.299 | *        | 0.313 | ***      |
|                                   | CD8B                   | 0.208 | ***      | 0.143 | 0.25     | 0.159 | **       |
| Monocyte                          | CD86                   | 0.371 | ***      | 0.590 | ***      | 0.352 | ***      |
|                                   | CD115<br>(CSF1R)       | 0.335 | ***      | 0.515 | ***      | 0.407 | ***      |
| TAM                               | CCL2                   | 0.207 | ***      | 0.445 | ***      | 0.235 | ***      |
|                                   | CD68                   | 0.375 | ***      | 0.532 | ***      | 0.314 | ***      |
|                                   | IL10                   | 0.248 | ***      | 0.424 | ***      | 0.332 | ***      |
| M1 Macrophage                     | INOS<br>(NOS2)         | 0.291 | ***      | 0.236 | 0.06     | 0.350 | ***      |
|                                   | IRF5                   | -0.05 | 0.30     | 0.462 | ***      | 0.365 | ***      |
|                                   | COX2<br>(PTGS2)        | 0.233 | ***      | 0.176 | 0.16     | 0.375 | ***      |
| M2 Macrophage                     | CD163                  | 0.312 | ***      | 0.537 | ***      | 0.424 | ***      |
|                                   | VSIG4                  | 0.327 | ***      | 0.457 | ***      | 0.362 | ***      |
| Neutrophils                       | MS4A4A                 | 0.239 | ***      | 0.55  | ***      | 0.305 | ***      |
|                                   | CD11b<br>(ITGAM)       | 0.35  | ***      | 0.51  | ***      | 0.418 | ***      |
|                                   | CCR7                   | -0.32 | ***      | 0.433 | ***      | 0.286 | ***      |
|                                   | HLA-DPB1               | 0.274 | ***      | 0.506 | ***      | 0.146 | **       |
|                                   | HLA-DQB1               | 0.294 | ***      | 0.304 | *        | 0.170 | ***      |
| Dendritic cell                    | HLA-DRA                | 0.374 | ***      | 0.531 | ***      | 0.357 | ***      |
|                                   | HLA-DPA1               | 0.347 | ***      | 0.489 | ***      | 0.330 | ***      |
|                                   | BDCA-1<br>(CD1C)       | 0.199 | ***      | 0.386 | **       | 0.343 | ***      |
|                                   | BDCA-4<br>(NRP1)       | 0.371 | ***      | 0.476 | ***      | 0.413 | ***      |
|                                   | CD11c                  | 0.302 | ***      | 0.435 | ***      | 0.327 | ***      |
| <b>Different types of T-cells</b> |                        |       |          |       |          |       |          |
| T cell (general)                  | CD3E                   | 0.263 | ***      | 0.374 | **       | 0.204 | ***      |
|                                   | CD2                    | 0.253 | ***      | 0.358 | **       | 0.195 | ***      |
| Th1                               | T-bet<br>(TBX21)       | 0.239 | ***      | 0.406 | ***      | 0.201 | ***      |
|                                   | STAT4                  | 0.437 | ***      | 0.371 | **       | 0.255 | ***      |
|                                   | STAT1                  | 0.574 | ***      | 0.769 | ***      | 0.629 | ***      |
| Treg                              | TNF- $\alpha$<br>(TNF) | 0.288 | ***      | 0.488 | ***      | 0.202 | ***      |
|                                   | FOXP3                  | 0.393 | ***      | 0.288 | *        | 0.444 | ***      |
| Tfh                               | STAT5B                 | 0.519 | ***      | 0.681 | ***      | 0.705 | ***      |
|                                   | BCL6                   | 0.271 | ***      | 0.360 | **       | 0.462 | ***      |
| T cell exhaustion                 | IL21                   | 0.163 | **       | NA    | NA       | 0.183 | ***      |
|                                   | PD-1<br>(PDCD1)        | 0.266 | ***      | 0.358 | **       | 0.132 | **       |
|                                   | CTLA4                  | 0.259 | ***      | 0.475 | ***      | 0.123 | 0.12     |
|                                   | TIM-3<br>(HAVCR2)      | 0.339 | ***      | 0.364 | **       | 0.330 | ***      |

Cor, *r* value of Spearman's correlatio. \**p* < 0.05; \*\**p* < 0.01; \*\*\**p* < 0.001.

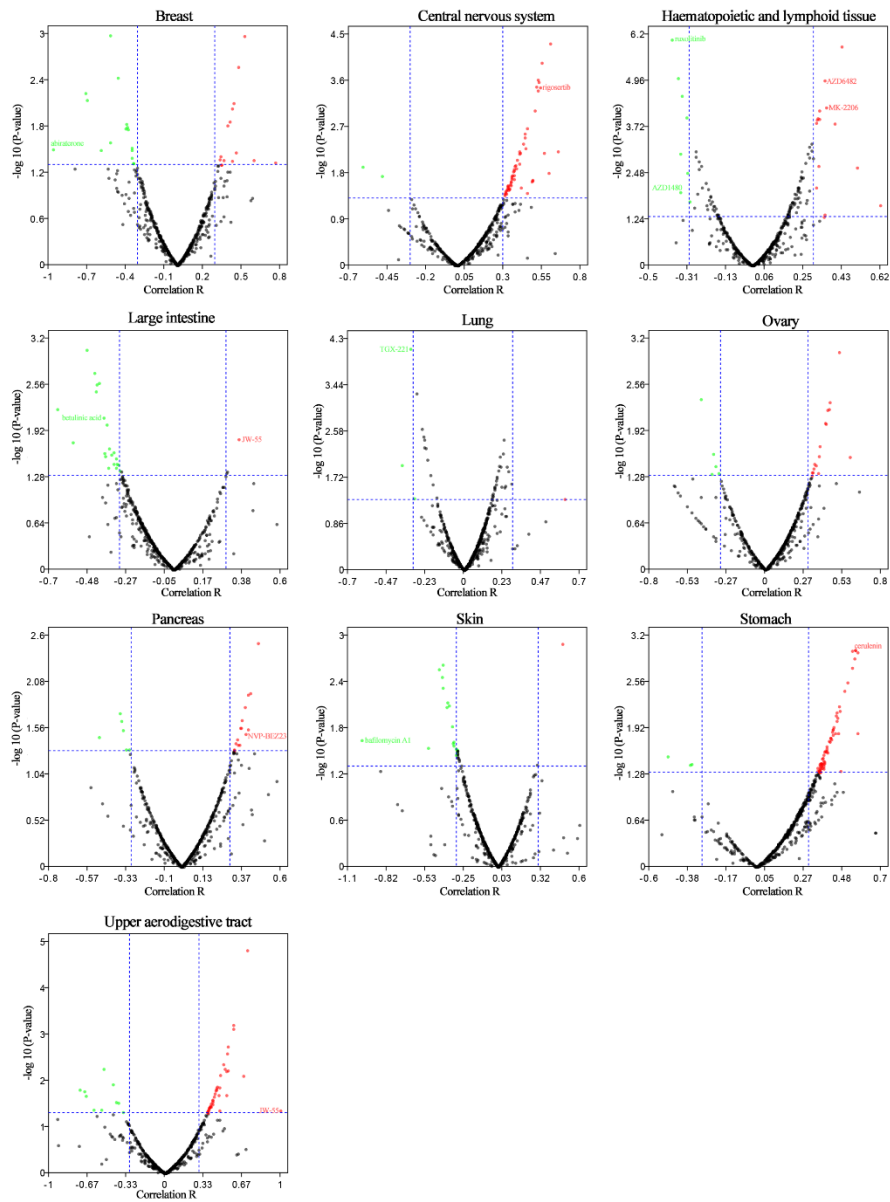

**Figure 1.** STAT3 expression and drug response correlation in 10 types of cancer cell lines. The volcano plots showed the correlation between STAT3 expression and drugs response across 10 types cancer cell lines by CCLE and CTRP. (The green color meaning the drugs with negative correlation coefficient greater than 0.3, and the red color representing the drugs with positive correlation coefficient greater than 0.3.).
